# Supplementary material for: The Tibetan Plateau Space-based Tropospheric Aerosol Climatology: 2007–2020
Source: Copernicus journal article supplement (doi:10.5194/essd-2023-290), 2023-09-04
Supplement: Supplementary file [file essd-2023-290-AC1-supplement.pdf]

Dear Editor,

Thank you very much for your help with the peer review of our manuscript. We are also very grateful to all the reviewers for their help to improve the quality of our manuscript. We have made a thorough revision of this manuscript according to the reviewers' recommendations. All modified content, including added or deleted parts, are marked with color (green) in the manuscript. Please see the following pages for a point-by-point response. We hope the revised manuscript is now suitable for publication in *Earth System Science Data*.

Kind regards,  
Jianping Huang

This study aims to report an aerosol index dataset over the Tibetan plateau. The data is derived using CALIPSO extinction profiles at 532 and 1064nm and MODIS AOD. The authors claim that this dataset is useful in understanding aerosol composition and radiative forcing over the TP. However, I have two major concerns and confusions and think significant revision is needed.

Response: Thank you for your comments. We have carefully reviewed all the recommendations and made corresponding changes. Any inaccuracies in the text have been corrected per your suggestions. We hope that the revised manuscript will address all your concerns.

The scope of ESSD is to publish original dataset. While the AI data reported does not exist in literature, it is calculated from existing satellite products, i.e., CALIPSO extinction profile and MODIS AOD. The calculation also seems quite straight forward. Therefore, this dataset can hardly be considered original, but a reprocessing of existing data.

Response: Thank you for your comments. We mainly consider the following aspects:

Firstly, we remove the low-confidence aerosol extinction coefficient for 532nm and 1064nm caused by the misclassification of cloud and other interferences (e.g., surface clutter, hygroscopicity, etc.). Based on this, we use an observed relationship between CALIPSO extinction at 532nm and 1064nm, to derive an altitude-latitude-based monthly climatology of Ångström exponent to compute altitude-latitude monthly climatology of vertical AI at 532nm and 1064nm between daytime and nighttime from 2007 to 2020, resulting in a better agreement between MODIS and in situ LIDAR measurement. Moreover, the aerosol characteristic data we provide are vertical and highly reliable, which can effectively characterize aerosol concentration information at vertical heights. This was not present in previous work.

Secondly, we choose the CALIPSO-CALIOP (version 4.20) level-2 aerosol profile product in this study, with vertical and horizontal resolutions of 60 m and 5 km,

respectively. The used parameter includes Extinction\_Coefficient\_532 and Extinction\_Coefficient\_1064 (EC) between daytime and nighttime from 2007 to 2020. All work is carried out based on these data. The following is detailed data optimization processing, calculation process, as well as verification and evaluation process.

1) To eliminate low-reliability aerosol target, our technique is based on median statistics rather than the mean due to the skew distribution of EC. The presence of some low-reliable aerosol target caused by cloud contamination, solar noise contamination, especially in the daytime, and ground clutter among most aerosol observations skews the distribution of the aerosol EC toward larger values (Thomason and Vernier, 2013).

2) The pseudo Ångström exponent (hereafter AE) is calculated using the EC at 532 and 1064nm with higher confidence, effectively creating a 14-year monthly mean climatology of the AE based on measured values. We refer to the mechanism method developed by Kovilakam et al. (2020) to further extend the calculation of AI (Nakajima et al., 2001; Liu et al., 2019), obtaining vertical AI using the product of the AOD (the vertical integral of EC) and AE. All data are gridded to  $0.05^\circ$  latitude and 0.06km altitude resolution. The specific formulas have been explained and clarified in detail in the manuscript to provide readers with a relatively clearer understanding. It should be noted that we do not assume that the derived value for pseudo Ångström exponent has any physical meaning as it accounts for not only the actual behavior of aerosol, but also for potential deficiencies in both data sets, which is simply a means to further calculate AI. The AI allows for a more accurate quantification of aerosol column number concentration than AOD. We have unified definitions throughout the entire manuscript to eliminate inconsistencies or ambiguities.

3) Validation for the constructed AI with MODIS and in situ LIDAR measurements using standardized frequency distributions. Why do we choose MODIS to validate? MODIS (Moderate-resolution Imaging Spectroradiometer) onboard Aqua can achieve near-simultaneous observations of clouds and aerosols with CALIPSO-CALIOP (less than two minutes). There is a certain degree of synchronization in data detection. Besides, MODIS can provide 550 nm AOD and AE products, which is very close to the 532nm detection wavelength channel provided by CALIOP, and to some

extent, the verification results are representative. It is worth mentioning that we chose this data because MODIS data is widely used and has certain reliability in aerosol research. In addition, why do we choose LIDAR to validate in situ? Due to the lack of ground-based LIDAR detection data on the Qinghai Tibet Plateau, we use the ground-based LIDAR detection data from the hinterland of the Taklimakan Desert (TD) to verify the validity and accuracy of the low confidence aerosol removal method and the AI calculated by CALIOP detection data. This also plays a certain role in verifying and evaluating the results of satellite remote sensing data or the processing of new parameters.

Lastly, our processing and effective validation of satellite remote sensing data, as well as the construction of new parameters for aerosol vertical characteristic distribution, are all based on previous literature research results, not simple satellite data processing processes. For example, in our literature review, we found that Kovilakam et al. (2020) had also combined multi-source satellite remote sensing detection data for calculation, integration, comparative verification, etc., and constructed a dataset of aerosol characteristics for the long time series of stratospheric aerosols. Their research effectively characterized the climate change characteristics of aerosols, and relevant results were published in *Earth System Science Data* in 2020.

All in all, based on the Level\_2 aerosol profile data product (extinction coefficient, EC) for daytime and nighttime detected by CALIOP from 2007 to 2020, we screened and eliminated the low-reliability aerosol target (LRAT). We also constructed an aerosol characteristic data set with higher reliability over the TP, verified the data set, and compared it with MODIS and ground-based LIDAR to test its effectiveness and accuracy. Thus, the vertical structure of aerosol characteristics climatology with higher reliability over the TP can be obtained, providing adequate observation facts and a basis for the TP.

Thomason, L. W. and Vernier, J.-P.: Improved SAGE II cloud/aerosol categorization and observations of the Asian tropopause aerosol layer: 1989–2005, *Atmos. Chem. Phys.*, 13, 4605–4616, <https://doi.org/10.5194/acp-13-4605-2013>, 2013.

Kovilakam, M., Thomason, L. W., Ernest, N., Rieger, L., Bourassa, A., Millán, L.: The global space-based stratospheric aerosol climatology (version 2.0): 1979–2018, *Earth System Science Data*, 12(4), 2607-2634, 2020.

Nakajima, T., Higurashi, A., Kawamoto, K., Penner, J. E.: A possible correlation between satellite - derived cloud and aerosol microphysical parameters, *Geophysical Research Letters*, 28 (7), 1171-1174, <https://doi.org/10.1029/2000GL012186>, 2001.

Liu, Z., Kar, J., Zeng, S., Tackett, J., Vaughan, M., Avery, M., Pelon, J., Getzewich, B., Lee, K.P., Magill, B., Omar, A., Lucker, P., Trepte, C., Winker, D.: Discriminating between clouds and aerosols in the caliop version 4.1 data products, *Atmos. Meas. Tech.*, 12, 703–734, 2019.

The definition, meaning and calculation of AI is quite confusing and not consistent throughout the manuscript. The authors define AI as  $AOD \cdot AE$ . This type of AI is sometimes considered as a proxy of anthropogenic CCNs, or aerosol column number (e.g., Nakajima, 2001) and is often used in aerosol-cloud interaction studies. But later in the manuscript, the authors seem to refer AI as a representation of absorbing aerosols, e.g., lines 639-640, 642-643. Note the absorbing AI is defined in a different way as the radiance contrast between two channels of the Rayleigh atmosphere and polluted atmosphere (Torres et al., 1998). Even if the authors want to calculate the CCN proxy AI, I don't understand the logic of using column AOD but layered AE? What is the rationale for this? Shouldn't the AI also correspond to a specific aerosol loading to represent anthropogenic aerosols? Please unify the AI definition and clarify its physical meaning.

Torres, O., Bhartia, P.K., Herman, J.R., Ahmad, Z. and Gleason, J., 1998. Derivation of aerosol properties from satellite measurements of backscattered ultraviolet radiation: Theoretical basis. *Journal of Geophysical Research: Atmospheres*, 103(D14), pp.17099-17110.

Response: Thank you for your comments. After careful consideration and literature review, we have made the following explanation for your questions:

1) We strongly agree with your opinion. The aerosol index (AI), which is defined as the product of the AOD and AE ( $AI=AOD*AE$ , Nakajima et al., 2001, Liu et al., 2019). The AI allows for a more accurate quantification of aerosol column number concentration than AOD (Nakajima et al., 2001). The AI is used to indicate small particles (those that act as CCN) with a high weight (Liu et al., 2019). Our research is based on this to obtain AI with vertical structure.

Besides, we have a broad understanding of traditional AI, the AI is a way to measure how backscattered ultraviolet (UV) radiation from an atmosphere containing aerosols differs from that of a pure molecular atmosphere (Guan et al., 2010). AI is especially sensitive to the presence of UV absorbing aerosols such as smoke, mineral dust, and volcanic ash. The index value is positive when absorbing aerosols are present, whereas clouds yield nearly zero value of AI. Torres et al. (1998) and Jeong and Hsu (2008) indicated that AI varies with aerosol layer height, optical depth, and single scattering albedo. Therefore, the significance of obtaining vertical structure AI in our research content is different from that of traditional AI representation, and the specific purpose and significance will be elaborated in detail in the following text.

2) We did not use column AOD or layer AE, but layers. We apologize for not expressing this clearly in the original manuscript. We have provided specific instructions on how to calculate AI in the revised manuscript. Thank you very much for the valuable feedback.

As the innovation of this work is to obtain AI with vertical structure, which has not appeared in previous work. So all our data is based on the vertical structural distribution of altitude-latitude. That is, we use an observed relationship between CALIPSO extinction at 532nm and 1064nm to derive an altitude-latitude-based monthly climatology of Ångström exponent to compute altitude-latitude monthly climatology of vertical AI at 532nm and 1064nm between daytime and nighttime from 2007 to 2020, with vertical and horizontal resolutions of 60 m and  $0.05^\circ$ , respectively.

Because we focus on the characteristics of aerosols in the troposphere over the TP, we took samples from the surface at an altitude of 12km with a vertical resolution of 0.06km. We integrated the extinction coefficients of each two layers to obtain an AOD, which corresponds to the average of the AE values of each two layers. This achieves spatial matching between AOD and AE at vertical heights. In the later stage, when we used the AI obtained from MODIS for comparative testing, due to the differences in horizontal and vertical space, we chose to use the PDF and average values of AI for characterization display in order to facilitate comparison.

3) At present, according to the literature we have reviewed, the AI obtained in the ultraviolet channel can currently characterize both absorption and non-absorption aerosols. The AI obtained from our research work cannot effectively characterize the absorption and non-absorption of its aerosols, as the results we obtained are in the non-ultraviolet band range, which is also an area that we need to further explore in the future. However, the aerosol concentration represented by the vertical structure AI we obtained is not possessed by the plane information AOD. Compared to the aerosol column concentration AOD information, as AOD is an integral result of the entire layer height, it will to some extent lose some of the true changes in the vertical height of aerosols. The significance of our work is that the AI with higher reliability obtained here can more effectively obtain aerosol concentration information at the vertical height. This is the main highlight of our research work. The reason why we use AI to test the results of MODIS and ground LIDAR is to verify the effectiveness and reliability of AI. Fortunately, the test results are very consistent and reasonable. Therefore, the AI of physical meaning here which can effectively characterize aerosol concentration information at vertical heights.

Finally, after a clear definition, we will review and modify the entire text to eliminate ambiguous expressions caused by AI. Thank you again for the valuable feedback provided by the experts. We have made effective modifications to the entire text.

- Liu, Z., Kar, J., Zeng, S., Tackett, J., Vaughan, M., Avery, M., Pelon, J., Getzewich, B., Lee, K.P., Magill, B., Omar, A., Lucker, P., Trepte, C., Winker, D.: Discriminating between clouds and aerosols in the caliop version 4.1 data products, *Atmos. Meas. Tech.*, 12, 703–734, 2019.
- Guan, H., Esswein, R., Lopez, J., Bergstrom, R., Warnock, A., Follette-Cook, M., Fromm, M., Iraci, L. T.: A multi-decadal history of biomass burning plume heights identified using aerosol index measurements, *Atmospheric Chemistry and Physics*, 10(14), 6461-6469, 2010.
- Nakajima, T., Higurashi, A., Kawamoto, K., Penner, J. E.: A possible correlation between satellite - derived cloud and aerosol microphysical parameters, *Geophysical Research Letters*, 28 (7), 1171-1174, <https://doi.org/10.1029/2000GL012186>, 2001.
- Torres, O., Bhartia, P. K., Herman, J. R., Ahmad, Z., and Gleason, J.: Derivation of aerosol properties from satellite measurements of backscattered ultraviolet radiation: Theoretical basis, *J. Geophys. Res.*, 103, 17099–17110, doi:10.1029/98JD00900, 1998.
- Jeong, M.-J. and Hsu, N. C.: Retrievals of aerosol single-scattering albedo and effective aerosol layer height for biomass-burning smoke: Synergy derived from “A-Train” sensors, *Geophys. Res. Lett.*, 35, L24801, doi:10.1029/2008GL036279, 2008.
